# Supplementary material for: The meiotic regulator JASON utilizes alternative translation initiation sites to produce differentially localized forms
Source: PubMed Central journal article supplement (PMC5853252; doi:10.1093/jxb/erx222), 2017-07-11
Supplement: erx222_suppl_supplementary_tables.pdf [file erx222_suppl_supplementary_tables.pdf]

**Table S1.** Primers used in this study. Gateway *att* site are in italics and restriction enzyme sites are in bold.

| <b>Name</b>         | <b>Sequence 5' to 3'</b>                                                  | <b>Role</b>                                               |
|---------------------|---------------------------------------------------------------------------|-----------------------------------------------------------|
| JAS F               | TCTTCCCATTTTCACTCATGG                                                     | Screening for T-DNA insertion                             |
| JAS R               | TCTGTACGAAAGCCAAGGAGA                                                     | Screening for T-DNA insertion                             |
| SAIL T-DNA LB2      | GCTTCCTATTATATCTTCCCAAATTACCAATACA                                        | Screening for T-DNA insertion in JAS with JAS screening F |
| JASg F              | GCCTTTCTTCCCCACTCCTACAG                                                   | JASg                                                      |
| JASg R              | GAAGGAAACTACCGAGTTTGGTTGC                                                 | JASg                                                      |
| shortJASg F         | GGAAATCAAATAATACGAGACGACTGTTGACGAA<br>CCGAAACC                            | Site directed mutagenesis for shortJASg                   |
| shortJASg R         | GGTTTCGGTTCGTCAACAGTCGTCTCGTATTATTT<br>GATTCC                             | Site directed mutagenesis for shortJASg                   |
| longJASg F          | CAGTCTGTAGAACCCTTGCTGTTTTCTCG                                             | Site directed mutagenesis for longJASg                    |
| longJASg R          | CGAGAAAACAAGCAAGGGTTCTACAGACTG                                            | Site directed mutagenesis for longJASg                    |
| stopJASg F          | CGATTTATCAGTCTAGAGAGCCATGGC                                               | Site directed mutagenesis for stopJASg                    |
| stopJASg R          | GCCATGGCTCTCTAGACTGATAAATCG                                               | Site directed mutagenesis for stopJASg                    |
| mutlongJASg F       | CAAATGATATGGACGACCTGTTGATGAACGACAA<br>CCTAAGC                             | Site directed mutagenesis for mutlongJASg                 |
| mutlongJASg R       | GCTTAGGTTGTCGTTTCATCAACAGGTCGTCATAT<br>CATTTG                             | Site directed mutagenesis for mutlongJASg                 |
| CTTCJASg F          | TTCATCAACAGTCGTCTCATGAAGTTTGATTTCCCT<br>CAAGAGCGAAACAGTGATTGACC           | Site directed mutagenesis for CTTCJASg                    |
| CTTCJASg R          | GGTCAATCACTGTTTCGCTCTTGAGGAAATCAAA<br>CTTCATGAGACGACTGTTGATGAA            | Site directed mutagenesis for CTTCJASg                    |
| longJASc F          | <i>GGGACAAGTTTGTACAAAAAAGCAGGCTTCATGAG</i><br><i>ACGACTGTTGATGAAC</i>     | longJASc, JAS NT, JASNT-JAS-LIKE                          |
| Short JASc F        | <i>AAAAAAGCAGGCTTCATGGCTTGTTCCTCGACTGC</i>                                | shortJASc                                                 |
| JASc R              | <i>CAAGAAAGCTGGGTTGAAGGAAACTACCGAGTTTG</i>                                | longJASc, shortJASc                                       |
| JAS-LIKE F          | <i>AAAAAAGCAGGCTTCATGGGTTGTCTCTTCGGTTGC</i>                               | JAS-LIKEc                                                 |
| JAS-LIKE R          | <i>CAAGAAAGCTGGGTTAAAGGAAATGACTGAATGTC</i><br><i>G</i>                    | JAS-LIKEc, NT-JAS-LIKE                                    |
| NTJAS-LIKE F        | GACAACCCATGGCTCTACAGACTGATAAATCG                                          | First PCR for NT-JAS-LIKE                                 |
| NTJAS-LIKE R        | CTGTAGAGCCATGGGTTGTCTCTTCGGTTGC                                           | First PCR for NT-JAS-LIKE                                 |
| NTJAS-F             | <i>GGGACAAGTTTGTACAAAAAAGCAGGCTTCATGAG</i><br><i>ACGACTGTTGATGAAC</i>     | JAS NT (for NT-GFP), NT-JAS-LIKE                          |
| NTJAS-R             | <i>GGGACCACCTTTGTACAAGAAAGCTGGGTAGTCGAG</i><br><i>AAAACAAGCCATGGC</i>     | JAS NT (for NT-GFP)                                       |
| promUBQ14 F         | <i>GGGACAACCTTTGTATAGAAAAGTTGATCCGAACAG</i><br><i>AGTTAAACCGG</i>         | UBQ14 promoter                                            |
| promUBQ14 R         | <i>GGGACTGCTTTTTGTACAACTTGAACTGAGAT</i><br><i>TAATCGCTTGG</i>             | UBQ14 promoter                                            |
| Long MtrJR1 cDNA F  | <i>GGGACAAGTTTGTACAAAAAAGCAGGCTTCAT</i><br><i>GTTGTGGCTTGTGAAACGTGGA</i>  | longMtrJR1c                                               |
| Short MtrJR1 cDNA F | <i>GGGACAAGTTTGTACAAAAAAGCAGGCTTCAT</i><br><i>GCAGTGCTTCTTCGGAATCAGAG</i> | shortMtrJR1c                                              |
| MtrJR1 cDNA R       | <i>GGGACCACCTTTGTACAAGAAAGCTGGGTGCTC</i><br><i>CTCAATCTCTCAAATGCCA</i>    | longMtrJR1c, shortMtrJR1c                                 |
| JAS LUC F           | <b>GGCAAGCTT</b> CACTGTTTCGCTCTTGAGG                                      | 5'end JAS for luciferase assay with HindIII site          |
| JAS LUC R           | <b>GGCGGATCC</b> ATTGGCGAGTGAAGAATGAGA                                    | 5'end JAS for luciferase assay with BamHI site            |

**Table S2.** Gene identifiers for JR proteins used in Fig. 4.

| <b>Abbreviation</b> | <b>Species</b>              | <b>Gene Identifier</b>       |
|---------------------|-----------------------------|------------------------------|
| AthJAS              | <i>Arabidopsis thaliana</i> | At1G06660                    |
| AthJL               | <i>Arabidopsis thaliana</i> | At2G30820                    |
| AlyJR1              | <i>Arabidopsis lyrata</i>   | 481999                       |
| AlyJR2              | <i>Arabidopsis lyrata</i>   | 887868                       |
| CruJR1              | <i>Capsella rubella</i>     | Carubv10012445m              |
| CruJR2              | <i>Capsella rubella</i>     | Carubv10023398m              |
| BraJR1              | <i>Brassica rapa</i>        | Bra015516                    |
| BraJR2              | <i>Brassica rapa</i>        | Bra022814                    |
| CpaJR1              | <i>Carica papaya</i>        | evm.model.supercontig_50.118 |
| TcaJR1              | <i>Theobroma cacao</i>      | Thecc1EG001947t1             |
| CclJR1              | <i>Citrus clementine</i>    | Ciclev10031282m              |
| PtrJR1              | <i>Populus trichocarpa</i>  | Potri.002G057000             |
| PtrJR2              | <i>Populus trichocarpa</i>  | Potri.005G205700             |
| MesJR1              | <i>Manihot esculenta</i>    | cassava4.1006366             |
| MesJR2              | <i>Manihot esculenta</i>    | cassava4.1007124m            |
| MtrJR1              | <i>Medicago truncatula</i>  | Medtr5g090900                |
| MtrJR2              | <i>Medicago truncatula</i>  | Medtr3g450760                |
| GmaJR1              | <i>Glycine max</i>          | Glyma14g03450                |
| GmaJR2              | <i>Glycine max</i>          | Glyma02g45320                |
| GmaJR3              | <i>Glycine max</i>          | Glyma08g41940                |
| GmaJR4              | <i>Glycine max</i>          | Glyma18g13680                |
| CsaJR1              | <i>Cucumis sativus</i>      | Cucsa.179850                 |
| PpeJR1              | <i>Prunus persica</i>       | ppa024302m                   |
| VviJR1              | <i>Vitis vinifera</i>       | GSVIVT01020830001            |
| SlyJR1              | <i>Solanum lycopersicum</i> | Solyc07g045010.2.1           |
| SlyJR2              | <i>Solanum lycopersicum</i> | Solyc12g006270               |
| AcoJR1              | <i>Aquilegia coerulea</i>   | Aquca12500018                |
| AcoJR2              | <i>Aquilegia coerulea</i>   | Aquca02600365                |

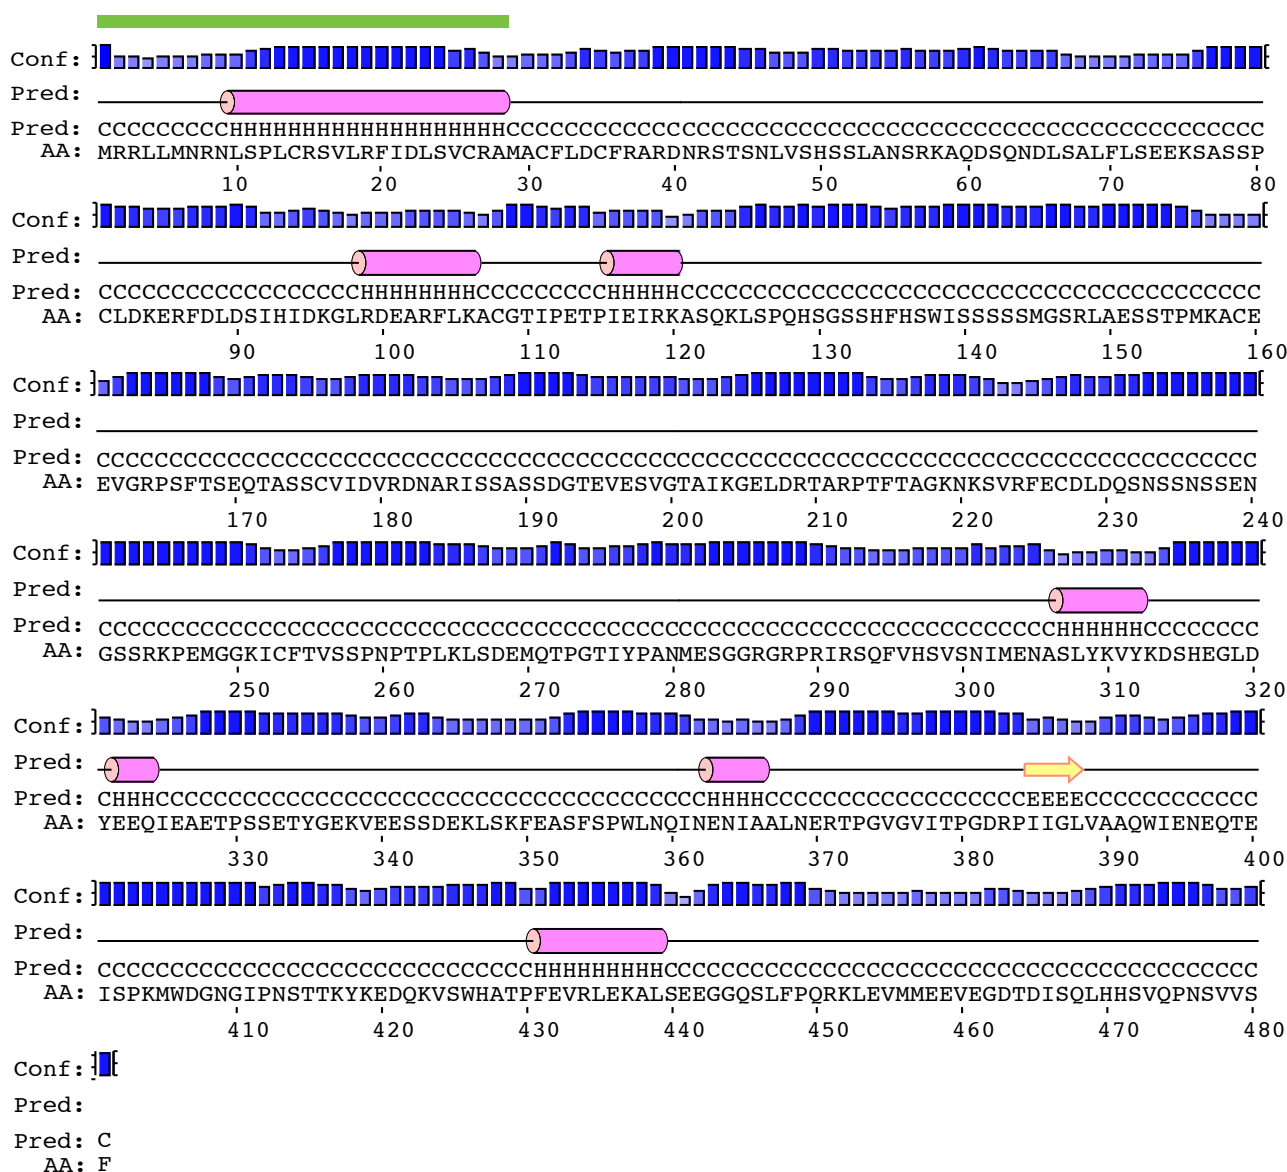

**Fig. S1.** Predicted secondary structure of the JAS protein. The AA sequence of JAS was analysed for localization signals and secondary structure. An N-terminal mitochondrial transit peptide (green rectangle) was predicted by TargetP and SLP-Local. The secondary structure of JAS was predicted by PSIPRED to be largely unstructured (black line) with some  $\alpha$ -helices (pink barrel) and one  $\beta$ -strand (yellow arrow). Conf indicates the confidence of the prediction, Pred is the predicted secondary structure and AA the shows the target sequence.

## stopJASg-GFP

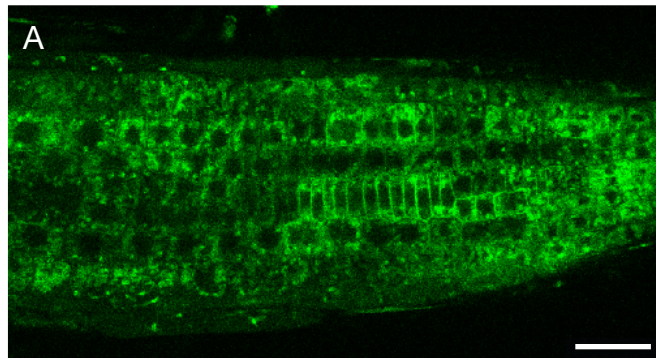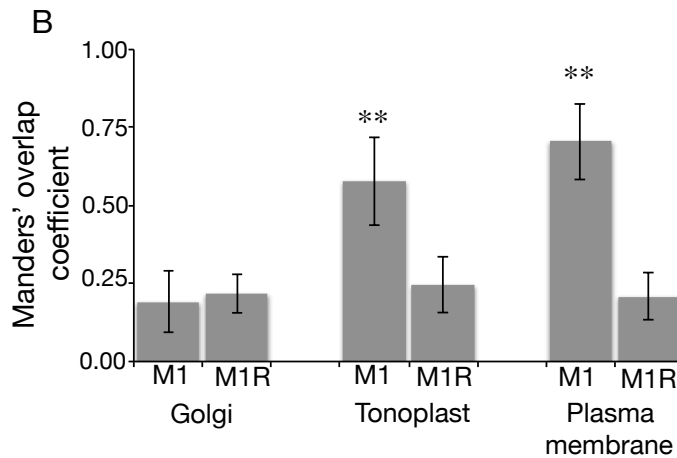

**Fig. S2.** Subcellular localization of stopJASg-GFP. CLSM was used to view the subcellular location of JAS without the N-terminal peptide (stopJASg-GFP) in the meristematic region of Arabidopsis roots. (A) GFP fluorescence in whole root tips for stopJASg-GFP. (B) Quantification of co-localization for stopJASg-GFP and markers for the Golgi, tonoplast and plasma membrane. For each combination the mean ( $\pm$  standard deviation) Manders' overlap coefficient 1 value (M1) from 20 images is shown along with the average ( $\pm$  standard deviation) for the same red image with the green image randomized (M1R). \*\* indicates a that the M1 value is significantly higher than the M1R value ( $t$ -test,  $P < 0.001$ ). Scale bar = 20  $\mu$ m.

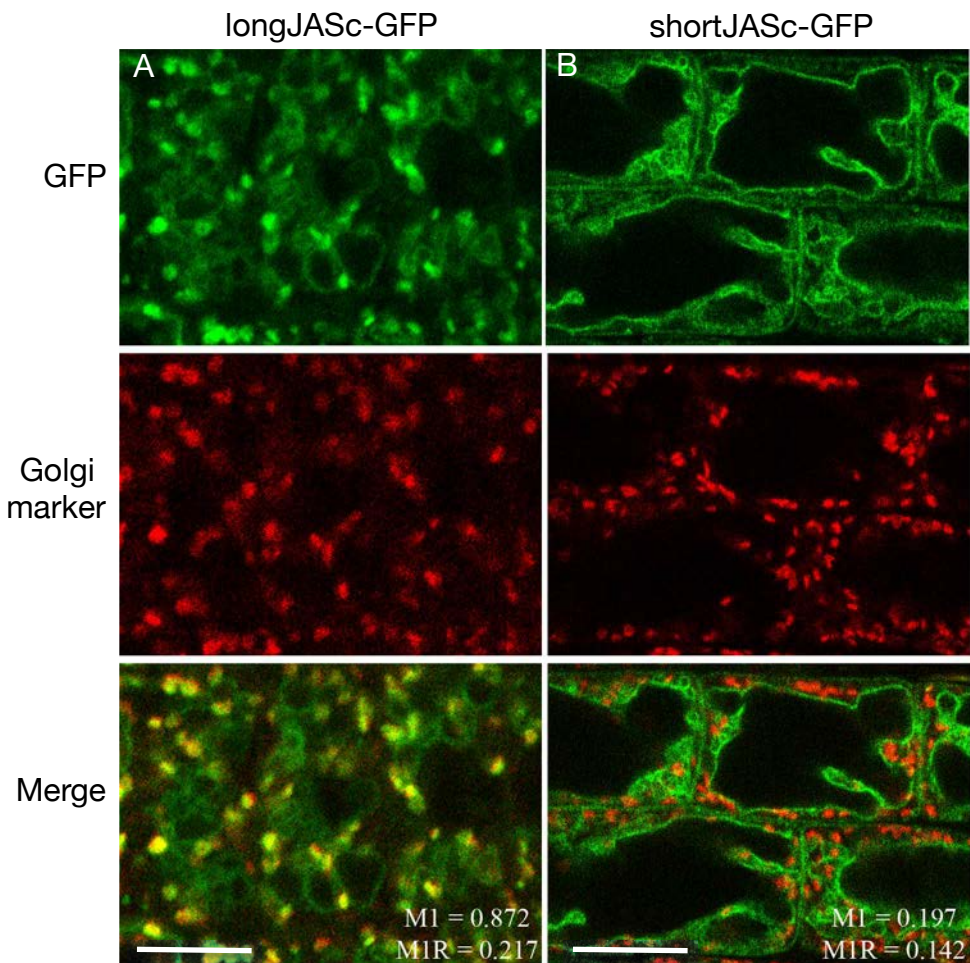

**Fig. S3.** Subcellular localization of cDNA encoded JAS-GFP. (A,B) CLSM images of meristematic root cells of Arabidopsis showing JAS-GFP (A) from longJASc-GFP (starting at the first ATG) or (B) shortJASc-GFP (starting at the second ATG). The top panel shows GFP fluorescence (green), the middle panel shows Golgi marker fluorescence (red) and in the bottom panel co-localization can be visually assessed by a yellow color in merged images. The Manders' overlap coefficient 1 for each pair of images (M1) and when the green image is randomized (M1R) is indicated on the merged image. Scale bar = 5  $\mu$ m.

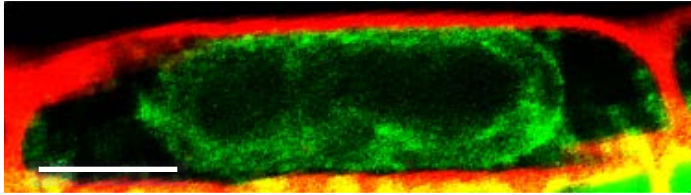

**Fig. S4.** Plasmolyzed Arabidopsis root cell with JAS-LIKE-GFP. CLSM image of an Arabidopsis root cell expressing JAS-LIKE-GFP (green) after incubation for 1h in mannitol. The plant cell wall is stained with red with propidium iodide. Scale bar = 5  $\mu\text{m}$ .

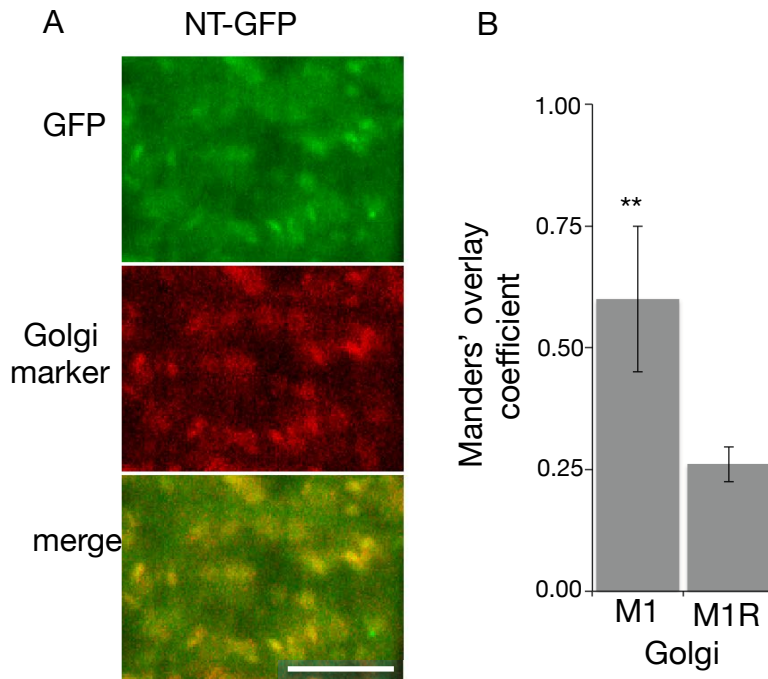

**Fig. S5.** Subcellular localization of GFP with the N-terminal 28 AA of longJAS. The N-terminal region of longJAS was cloned upstream of GFP (NT-GFP) and localization analysed in Arabidopsis root cells. (A) CLSM images of Arabidopsis meristematic roots cells with NT-GFP. Top panel shows GFP fluorescence (green), the middle panel shows Golgi marker fluorescence (red) and in the bottom panel co-localization can be visually assessed by a yellow color in merged images. (B) Quantification of co-localization of NT-GFP and the Golgi marker. For each combination of GFP and marker the average ( $\pm$  standard deviation) Manders' overlap coefficient 1 value (M1) from 20 images is shown (M1) along with the average ( $\pm$  standard deviation) for the same red image with the green image randomized (M1R). \*\* indicates that the M1 value is significantly higher than the M1R value (*t*-test,  $P < 0.001$ ). Scale bar = 5  $\mu$ m.

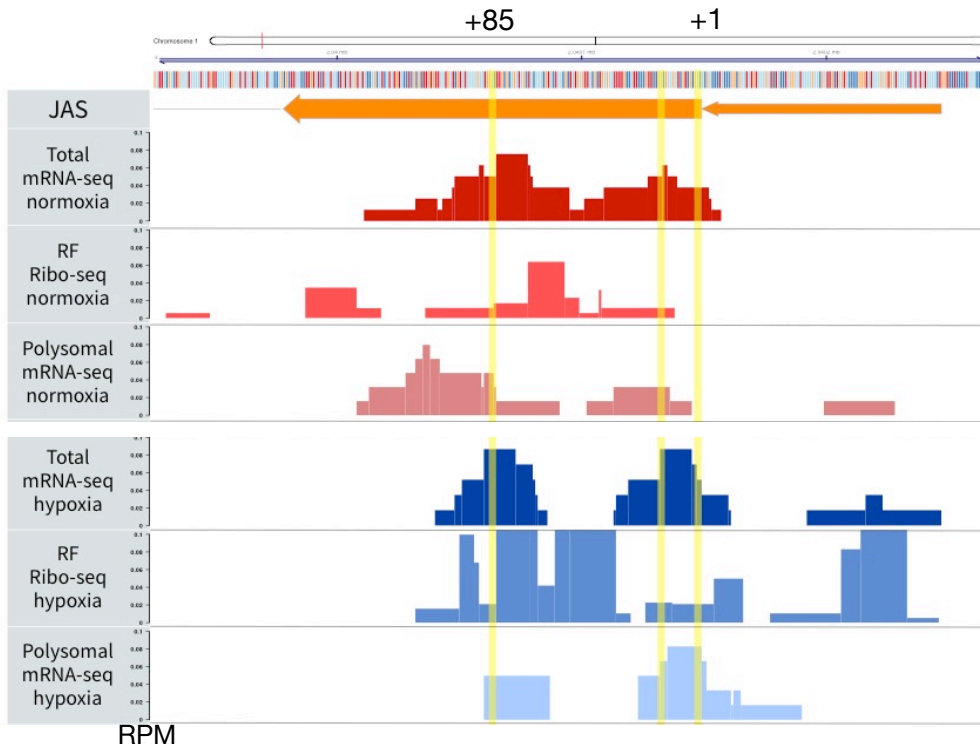

**Fig. S6.** Ribosome protection data for *JAS*. Total RNA read coverage, polysomal mRNA and ribosome footprint (RF) at the 5'UTR and first exon of *JAS*, under normal oxygen (normoxia) and oxygen deprived (hypoxia) conditions. Data from Juntawong et al., 2014. Note *JAS* is in the reverse orientation. The three potential start codon positions are highlighted in yellow through all samples with those at +1 and +85 indicated above. The 5' UTR of *JAS* is indicated by a narrow orange arrow and the exon by a thick orange arrow. The read coverage was normalized by reads per million (RPM).
